# Supplementary material
Source: PubMed Central journal article supplement (PMC1687179)
Supplement: NIHMS12297-supplement-Sfigs_tab.pdf [file NIHMS12297-supplement-Sfigs_tab.pdf]

## Supplementary Figure 1

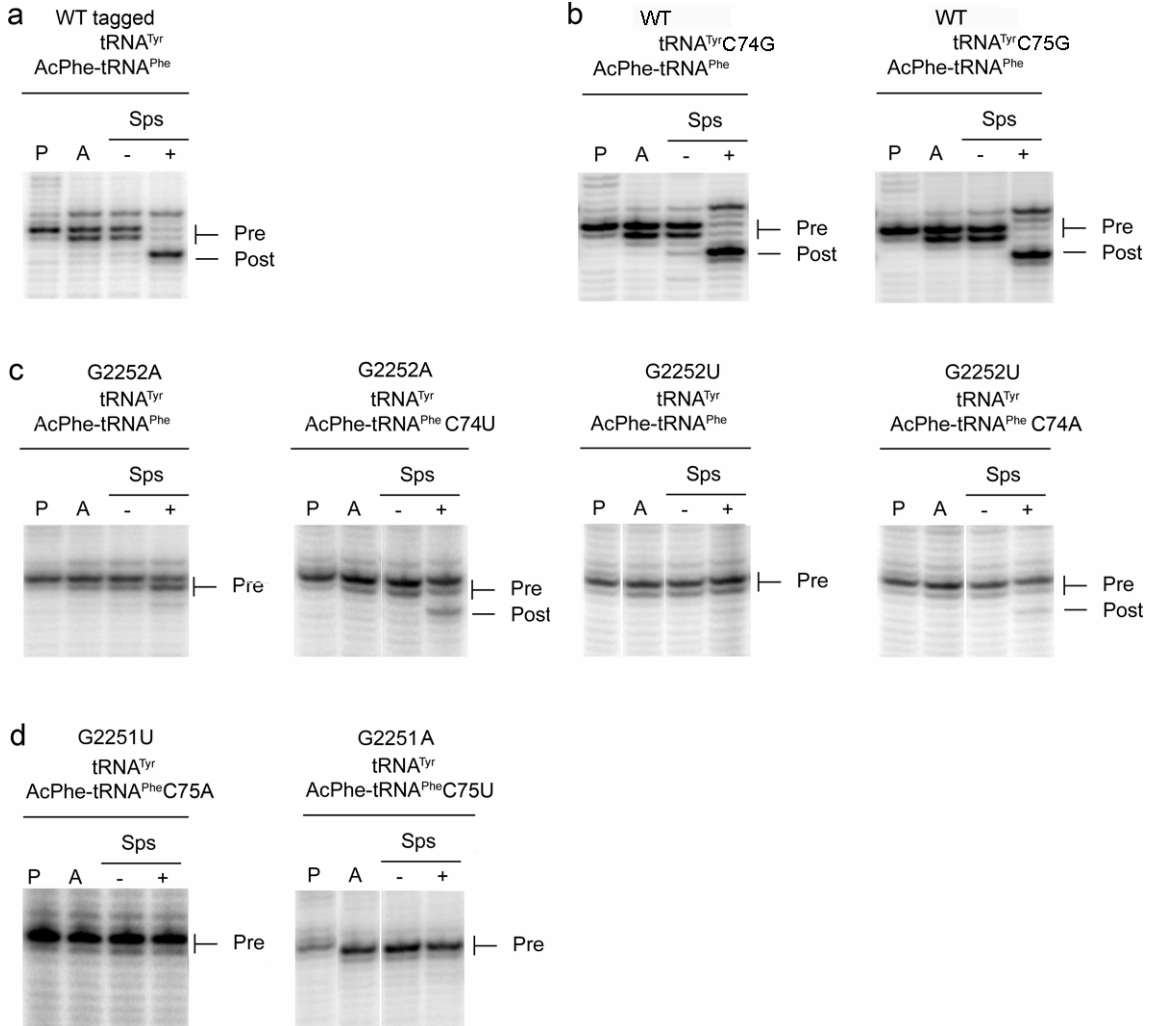

**Supplementary Figure 1:** Toeprint analysis of sparsomycin-mediated translocation on m301 messenger RNA. Pre-translocation complexes were assembled by binding deacylated tRNA<sup>Tyr</sup>, tRNA<sup>Tyr</sup>C74G, tRNA<sup>Tyr</sup>C75G to the P site (P lanes), followed by binding of N-Ac-Phe-tRNA<sup>Phe</sup>, N-Ac-Phe-tRNA<sup>Phe</sup> C74U,A or N-Ac-Phe-tRNA<sup>Phe</sup> C75U,A to the A site (A lanes). Complexes were incubated with sparsomycin (+ Sps lane) or 2.5 % DMSO (- Sps lane). Ribosomes used were either **(a)** WT MS2-tagged **(b)** WT-MRE600 **(c)** G2251A or G2251U or **(d)** G2252A or G2252U. Reactions were carried out as described in Materials and Methods except that buffer C (20 mM HEPES, 4.5 mM Mg(OAc)<sub>2</sub>, 150 mM NH<sub>4</sub>OAc, 2 mM spermidine, 0.05 mM spermine, 4 mM 2-mercapthoethanol, pHed to 7.5 with KOH) was used which resulted in less efficient “rescues” than in buffer A.

## Supplementary Figure 2

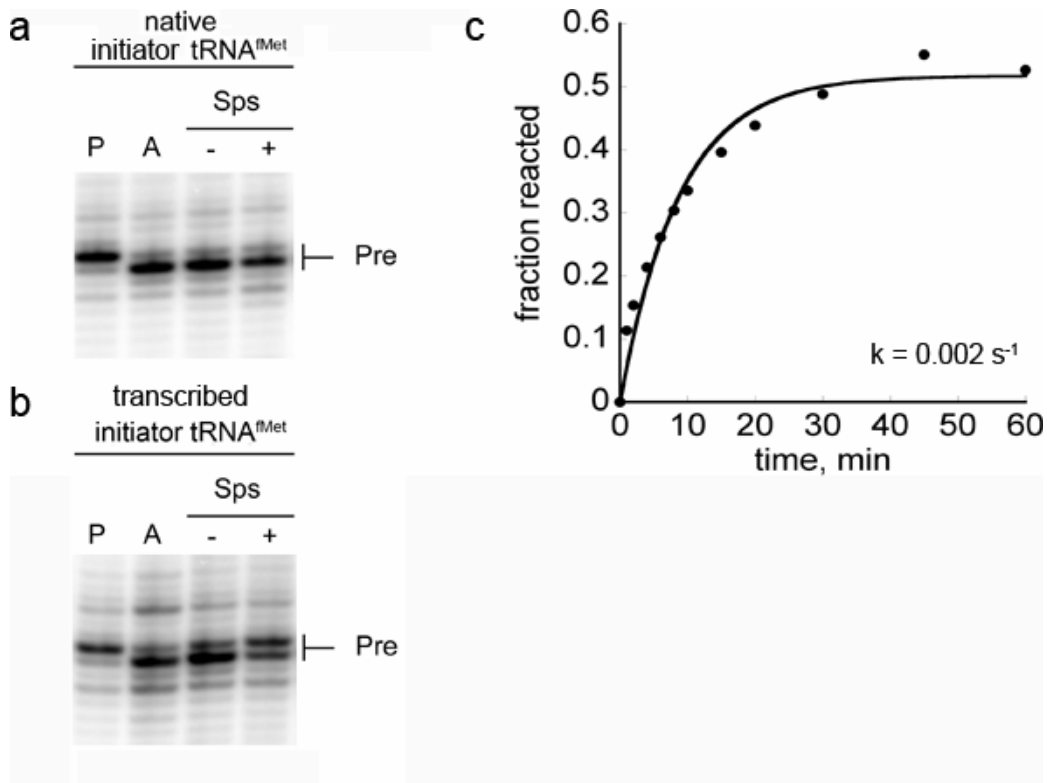

**Supplementary Figure 2:** Toeprint analysis of sparsomycin-mediated translocation and puromycin reactivity analysis comparing native and transcribed initiator tRNAs. Pre-translocation complexes were assembled by binding native (**a**) or transcribed (**b**) initiator tRNA<sup>Met</sup> to the P site (P lanes) of WT ribosomes, followed by binding of N-Ac-Phe-tRNA<sup>Phe</sup> to the A site (A lanes). Complexes were incubated with sparsomycin (+ Sps lane) or 2.5 % DMSO (- Sps lane). (**c**) Puromycin reactivity of pre-translocation complexes on m301 mRNA.

### Supplementary Figure 3

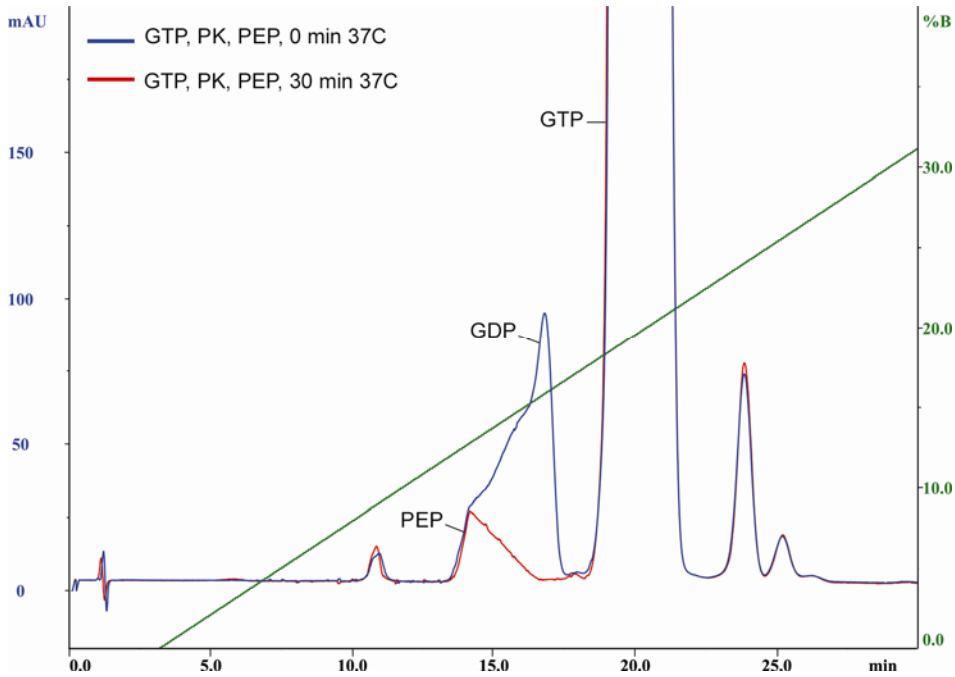

**Supplementary Fig. 3:** FPLC analysis of GTP before and after incubation with PEP/PK. GTP (16 mM) was incubated with 40 mM 2-phospho(enol)pyruvate (PEP, potassium salt, pH 7.0, Roche) and 4  $\mu\text{g/ml}$  rabbit-muscle pyruvate kinase (PK, Roche) in buffer B for 0 min (blue trace) or 30 min (red trace), 37° C. Reactions were separated on a ResourceQ column, with a 0 – 350 mM NaCl gradient in 20 mM Tris/Cl pH 7.5 over 30 min, 5 ml/min (see Material and Methods).

#### Supplementary Figure 4

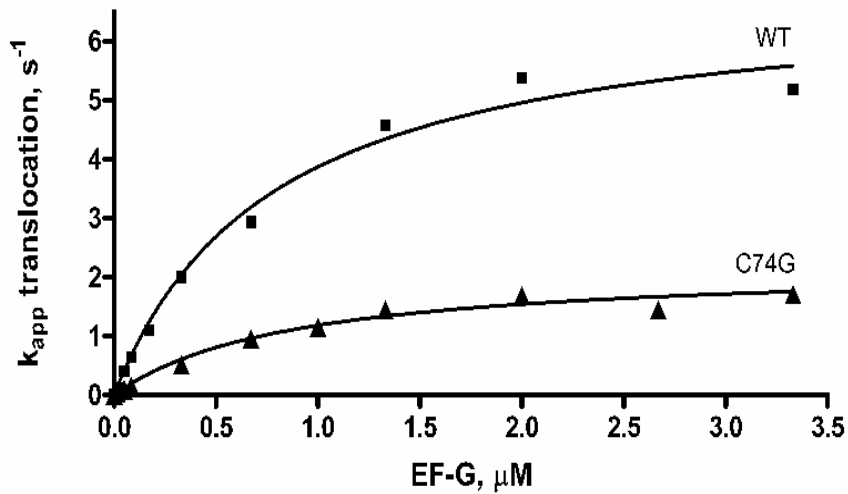

**Supplementary Figure 4:** Pre-steady state kinetic analysis of EF-G-mediated translocation. Pre-translocation complexes of WT ribosomes with  $tRNA_f^{Met}$  in the P site and f-Met-Phe- $tRNA^{Phe}$  in the A site were rapidly mixed with various concentrations of EF-G:GTP in the stopped-flow spectrophotometer and fluorescence measured as a function of time. The A site tRNAs used are indicated (either WT or C74G).  $K_{1/2}$  values for EF-G were calculated in GraphPad prism using the hyperbolic Michaelis-Menten equation:  $Y=(x*m1)/(x+m2)$ .  $K_{1/2}$  for complexes with WT tRNA  $0.8 \pm 0.1 \mu M$  and with C74G tRNA  $0.9 \pm 0.3 \mu M$ .

**Supplementary Table 1:** Hybrid reactivity of dipeptidyl tRNA complexes with puromycin

| ribosomes |      | WT     |        | G2252C |        | ribosomes |      | WT     |        | G2251C |        |
|-----------|------|--------|--------|--------|--------|-----------|------|--------|--------|--------|--------|
|           |      | P site | A site | P site | A site |           |      | P site | A site | P site | A site |
| WT        | WT   | 0.06   | n.r.   | WT     | WT     | 0.06      | n.r. | WT     | WT     | 0.06   | n.r.   |
| WT        | C74G | n.r.   | 1.0    | WT     | C75G   | n.r.      | 0.06 | WT     | C75G   | n.r.   | 0.06   |

Rates are expressed in  $\text{min}^{-1}$ , n.r. , no product after 60 min of incubation, SD were below 22%.

Pre-translocation complexes for analysis of puromycin reactivity were prepared as for stopped-flow experiments. For reaction with puromycin, complexes were incubated with 1 mM puromycin at 37°C as described for Fig. 3.

**Supplementary Table 2:** EF-G dependent translocation with GTP, GTP or GTP/GDP

---

|                   |     |
|-------------------|-----|
| GTP, 0 mM         | 0.5 |
| GTP, 1 mM         | 4.0 |
| GTP, 2 mM         | 4.8 |
| GTP +GDP each 1mM | 4.6 |

---

Rates are expressed in  $s^{-1}$ , SD were below 20%

---

Translocation reactions were carried out on complexes containing MRE600 ribosomes, tRNA<sup>fMet</sup> in the P site and dipeptidyl fMetPhe-tRNA<sup>Phe</sup> in the A site.

**Supplementary Table 3:** EF-G dependent translocation with/without GTP and with/without energy regeneration system (PEP/PK).

| GTP | PK/PEP | rate in s <sup>-1</sup> |
|-----|--------|-------------------------|
| -   | -      | 0.5                     |
| +   | -      | 4.0                     |
| -   | +      | 0.3                     |
| +   | +      | 3.3                     |

SDs were below 20 %

Reactions with PEP/PK: EF-G, 6  $\mu$ M was preincubated with 2 mM GTP, 5 mM 2-phospho(enol)pyruvate (PEP, potassium salt, pH 7.0, Roche) and 4  $\mu$ g/ml rabbit-muscle pyruvate kinase (PK, Roche) in buffer B for 30 min, 37° C. Control reactions were incubated without PEP/PK. This system was modified from Czworkowski J. and Moore P.B., *Biochemistry* 1997, 36, 10327-34. Translocation reactions were carried out on complexes containing MRE600 ribosomes, tRNA<sup>fMet</sup> in the P site and dipeptidyl fMetPhe-tRNA<sup>Phe</sup> in the A site.
